# Supplementary material for: Geranylgeranylacetone attenuates cerebral ischemia–reperfusion injury in rats through the augmentation of HSP 27 phosphorylation: a preliminary study
Source: BMC Neurosci. 2021 Feb 8;22:9. doi: 10.1186/s12868-021-00614-7 (PMC7869466; doi:10.1186/s12868-021-00614-7)
Supplement: Supplementary file 1 — Additional file 1: Table S1. The pre-processed data of gas chromatography-mass spectrometry. [file 12868_2021_614_MOESM1_ESM.xlsx]

## Sheet: PeakTableUpDate
PeakNo.	RT	QuantMS	Compound_Name	C	C	C	C	C	C	M1	M1	M1	M1	M1	M1	R1	R1	R1	R1	R1	R3	R3	R3	R3	R3	R3	R5	R5	R5	R5	R5	R5	R24	R24	R24	R24	R24	R24
2300	716.85	217	1,5-Anhydro-D-glucitol	0.0713383	0.114808	0.0507865	0.0491235	0.0561147	0.0511558	0.10164	0.0713793	0.0676391	0.061838	0.139193	0.0788851	0.0469121	0.0866123	0.0544663	0.0704061	0.0653481	0.0631625	0.0532043	0.0613698	0.0685861	0.127927	0.0739551	0.0593974	0.0604923	0.0999048	0.077635	0.0583352	0.064074	0.0397874	0.0558392	0.071453	0.0316723	0.114842	0.0536207
1912	654.65	204	1,6-Anhydroglucose	0.0153339	0.00832602	0.0135632	0.00796973	0.000670383	0.0104784	0.00851109	0.0106356	0.0104779	0.0062302	0.0187454	0.00100076	0.00726997	0.0067493	0.00797574	0.00134952	0.0125271	0.00684661	0.00901659	0.0118999	0.00744055	0.00809667	0.00792854	0.0138466	0.00802491	0.0124697	0.00733779	0.00133375	0.0088561	0.00939915	0.0105121	0.00155531	0.00871717	0.00787182	0.000984955
741	504.4	234	2,3-Bisphospho-glycerate	0.0059592	0.00576261	0.00410734	0.00336548	0.00334602	0.00966048	0.0030327	0.00428448	0.00454897	0.00476828	0.00218464	0.00449193	0.00404493	0.00482134	0.00339972	0.00194317	0.00308759	0.0107107	0.00256747	0.00301764	0.00393166	0.00328081	0.00406903	0.00719516	0.00302844	0.00428239	0.00375373	0.00110956	0.00449945	0.00611653	0.00345786	0.00162293	0.0017395	0.00366177	0.00283613
473	426	174	2-Aminoethanol	0.705301	0.810571	0.538187	0.472411	0.726898	0.476609	1.25897	0.80951	1.17737	0.823365	1.04739	1.31604	0.915942	1.40119	0.767859	1.26781	1.09061	0.651065	0.721755	0.590939	0.890787	0.765346	1.06263	0.75994	0.794601	0.549512	0.696524	0.614284	0.678952	0.873597	0.746502	0.516424	0.643041	0.729694	0.438577
2824	784.55	315	2-Deoxyribose-5-Phosphate	0.00596104	0.00384946	0.0048158	0.00530016	0.00484738	0.00300546	0.00315572	0.00368084	0.00500682	0.00346354	0.00233072	0.00508851	0.00274401	0.00331371	0.00340126	0.00521514	0.00554517	0.00565202	0.005573	0.00304725	0.00554139	0.00469932	0.00493271	0.00432543	0.00458021	0.0054646	0.00533157	0.00655896	0.00398619	0.00199354	0.00393823	0.0067115	0.00417723	0.00324963	0.00629936
3569	936.9	217	2-Deoxyuridine	0.00226721	0.00175963	0.00273963	0.00255695	0.00264175	0.00224296	0.00120613	0.00227537	0.00195617	0.00245421	0.0114611	0.00231745	0.00180226	0.00128115	0.00241717	0.00350149	0.00607167	0.00184951	0.00209957	0.00244824	0.0052292	0.00218132	0.0018984	0.00264737	0.00443636	0.00285786	0.002371	0.00412709	0.00396059	0.00375323	0.001741	0.00463888	0.00131634	0.00172268	0.00279266
1335	592.45	275	2-Isopropylmalic acid	1	1	1	1	1	1	1	1	1	1	1	1	1	1	1	1	1	1	1	1	1	1	1	1	1	1	1	1	1	1	1	1	1	1	1
263	357.95	233	3-Hydroxy-Butyrate	0.0278456	0.0204016	0.0145275	0.0138748	0.0156752	0.0188648	0.0898645	0.0541052	0.0600947	0.0316415	0.0274773	0.127176	0.015384	0.0212114	0.0173738	0.0189761	0.0177956	0.0237162	0.0324413	0.0176984	0.0266647	0.0301018	0.0316059	0.032578	0.0228616	0.0138106	0.0187686	0.0217702	0.0259823	0.0263354	0.0264366	0.0130646	0.01973	0.0176839	0.00996828
1144	571.95	174	4-Aminobutyric acid	6.6596	6.05815	5.70863	5.30782	6.66216	5.79418	10.1613	10.5953	10.4646	10.5792	8.63786	14.0525	6.00078	5.89054	6.0783	6.69404	7.18559	6.13318	5.84068	5.35213	7.1429	7.01506	6.71397	6.77021	5.70424	5.4353	6.34913	6.50677	8.20934	5.7364	6.21061	6.33249	6.04566	7.0915	6.99513
3198	861.3	290	5-Hydroxyindoleacetate	0.00300158	0.0041478	0.00298141	0.000482226	0.00556196	0.00337259	0.00236679	0.00436467	0.00287445	0.00271364	0.00409703	0.00489083	0.00247621	0.00204792	0.0035335	0.00439542	0.00580932	0.00220841	0.0029542	0.00341814	0.00267964	0.00352449	0.0048529	0.00185003	0.0026058	0.0028843	0.00365335	0.00685865	0.0049723	0.00225223	0.00497139	0.00695156	0.00418327	0.00301743	0.00503514
1318	590.7	129	Acetoacetic acid	0.0263513	0.0226609	0.0209767	0.0314487	0.002711	0.00274803	0.0190119	0.0247477	0.0197456	0.0278844	0.0367803	0.0247277	0.0230524	0.00275039	0.00239103	0.00312701	0.0142636	0.0215982	0.00283007	0.00266242	0.00222761	0.00322548	0.0026666	0.020769	0.0245737	0.025358	0.00249824	0.00366954	0.00377738	0.0247672	0.0251162	0.0236779	0.0236367	0.0202479	0.0035134
2452	732	264	Adenine	0.0349439	0.0280295	0.0370265	0.0325127	0.0409817	0.0326386	0.0286663	0.0354393	0.0319187	0.0449313	0.00351269	0.041001	0.0300343	0.0286257	0.034088	0.0354584	0.0443685	0.0325682	0.0321059	0.0399886	0.0369768	0.0364668	0.031536	0.0279868	0.027037	0.0329286	0.0367653	0.0325912	0.0321643	0.0261352	0.0472943	0.049354	0.0427969	0.0343625	0.0525605
2369	724.6	205	Allose	0.00345942	0.00214921	0.00505897	0.00914497	0.00252535	0.00315861	0.00236679	0.00232379	0.00245518	0.002547	0.00697225	0.00285754	0.00405382	0.00149035	0.00576461	0.0100472	0.00639649	0.00446267	0.00225833	0.00764075	0.00830396	0.00400242	0.00478734	0.00798034	0.00561769	0.00836505	0.00639053	0.00518403	0.00390401	0.0143348	0.0133168	0.00486203	0.0148032	0.00171053	0.00230269
725	495.35	219	Allothreonine	0.00774111	0.00507179	0.00580257	0.00443821	0.00534243	0.00398845	0.00585547	0.00618618	0.00564087	0.00387257	0.00294827	0.00404892	0.00720397	0.00546719	0.00356425	0.00554302	0.00643576	0.00452423	0.00430061	0.00403978	0.00420157	0.00588827	0.00553131	0.00558832	0.00666791	0.00534565	0.00556626	0.0077829	0.00719508	0.00442115	0.00343372	0.00657964	0.00451425	0.00514495	0.00639803
1083	567.35	178	alpha-Phenylglycine	0.00594089	0.00623474	0.00743032	0.00940774	0.00569751	0.00546783	0.0105382	0.00999107	0.0101345	0.00999294	0.0121184	0.0144748	0.00859755	0.00869933	0.0109249	0.0176904	0.0126109	0.00570965	0.00632976	0.00670046	0.00896736	0.00442739	0.00741831	0.00470239	0.00893891	0.00831953	0.00554788	0.00670766	0.00345137	0.00652576	0.00842545	0.0101366	0.0129987	0.00600812	0.0070084
2972	813.7	315	Arabinose-5-phosphate	0.132187	0.0970534	0.136336	0.161673	0.163321	0.152171	0.0632067	0.110381	0.107826	0.146894	0.114644	0.0999151	0.101073	0.0913012	0.150577	0.135827	0.105153	0.108466	0.113322	0.154356	0.150151	0.118978	0.130641	0.0968115	0.0952907	0.107042	0.157053	0.210804	0.177765	0.0712046	0.10027	0.161164	0.115397	0.114621	0.169864
1920	655.15	217	Arabitol	0.072558	0.0415649	0.0548053	0.0348878	0.041465	0.0347588	0.0391162	0.041102	0.0494213	0.0379474	0.0388587	0.0457136	0.0410738	0.0337398	0.0309696	0.0366923	0.0400334	0.0349089	0.0462658	0.040107	0.042871	0.0389589	0.0410166	0.0533123	0.0377517	0.0444878	0.0357827	0.0404153	0.0389081	0.0417707	0.0415592	0.0400999	0.0343034	0.0376316	0.0404132
2647	756.05	332	Ascorbic acid	0.172061	0.0717509	0.0934582	0.0604645	0.116187	0.10357	0.0458689	0.0558254	0.174893	0.0690908	0.236339	0.102155	0.0780265	0.0860903	0.105719	0.692388	0.19452	0.135967	0.135957	0.116163	0.166856	0.198654	0.148633	0.113648	0.0863989	0.217657	0.109459	0.44366	0.177922	0.0759239	0.167885	0.192091	0.0753533	0.155362	0.236214
2337	720.85	217	alpha-Sorbopyranose	0.0521476	0.0283163	0.0732841	0.0918829	0.0496731	0.0420167	0.0163603	0.0306117	0.0189277	0.051241	0.0499744	0.00924862	0.0560224	0.0396139	0.100377	0.0988115	0.0536367	0.0685486	0.0664654	0.0873358	0.0677064	0.0421726	0.0659026	0.0633007	0.0560051	0.0917498	0.0811356	0.057475	0.0364213	0.149581	0.165022	0.120834	0.199655	0.034867	0.0547979
1754	637.6	231	Asparagine	0.00451793	0.00523255	0.00577727	0.0075568	0.00677455	0.00743056	0.00554257	0.00701221	0.00607301	0.0075766	0.00992716	0.00453253	0.00691078	0.0103874	0.00778354	0.00878393	0.00820086	0.0070981	0.00771913	0.00549201	0.0069869	0.00838273	0.00928679	0.0080394	0.00948884	0.00904648	0.0064188	0.00751752	0.0064326	0.004655	0.00648365	0.00149783	0.0062341	0.00660382	0.00645488
1057	564.2	232	Aspartic acid	6.66511	5.04806	5.51855	6.47819	6.23221	6.15889	2.77358	3.28603	2.86637	3.05249	4.63358	2.8489	6.55408	7.29112	7.25255	7.13294	7.44119	7.10976	7.03934	6.95249	6.81398	6.31762	6.48288	5.64832	5.71594	6.97223	5.22607	7.06692	6.09489	3.2886	4.21726	7.13131	4.13447	6.09343	6.1428
784	518.3	248	beta-Alanine	0.0990613	0.0890127	0.0686778	0.072243	0.0644127	0.0713457	0.0861432	0.0704504	0.0883184	0.0798526	0.100971	0.115027	0.0919928	0.128412	0.0868183	0.127469	0.122934	0.0915955	0.0911888	0.0797943	0.119073	0.0770408	0.120205	0.0855081	0.103137	0.0847799	0.066723	0.0845687	0.0643448	0.0602183	0.0653372	0.0587062	0.0645264	0.0578272	0.0448832
2169	696.25	295	Benzen-1,4-Dicarboxylic acid	0.010435	0.00166115	0.00138598	0.00174987	0.00102252	0.00125237	0.00273585	0.00154011	0.00133755	0.00198647	0.00461497	0.00155673	0.00165123	0.001023	0.00185439	0.00203981	0.00185256	0.00150371	0.00149799	0.0017378	0.00187965	0.00150562	0.00139815	0.00152519	0.000864358	0.00134669	0.00133607	0.00266522	0.00155729	0.00135777	0.00112339	0.00335406	0.00200851	0.00121086	0.00172911
2184	700.95	273	Citric acid	0.426935	0.40477	0.302242	0.348391	0.487249	0.455952	0.404264	0.441052	0.504647	0.35839	0.442253	0.718115	0.341181	0.306115	0.380463	0.492223	0.547875	0.301869	0.42075	0.393499	0.512408	0.317277	0.57484	0.337589	0.360255	0.428552	0.35532	0.601871	0.43769	0.554912	0.713295	0.334354	0.736969	0.22265	0.385614
1297	585.35	329	Creatinine	0.0543745	0.0345785	0.0390479	0.0391325	0.0331803	0.0285307	0.051572	0.0365709	0.0320061	0.0276515	0.0816617	0.0267522	0.038128	0.0378807	0.0287554	0.0254648	0.0256681	0.0356817	0.0335419	0.0256108	0.0281964	0.0265608	0.022034	0.0422607	0.0378535	0.0388675	0.0352652	0.0301433	0.0260348	0.032015	0.0352318	0.0389436	0.0302471	0.0240142	0.0246924
3303	884.35	103	Cysteine	0.00338616	0.00289651	0.00305169	0.00206462	0.00273457	0.00128061	0.00405965	0.00305148	0.00163979	0.00379682	0.0142168	0.00196974	0.00274274	0.00149899	0.00233568	0.0034618	0.00293054	0.00315544	0.00174149	0.00278605	0.00278208	0.00302065	0.0023445	0.00343429	0.0024976	0.00190622	0.0118239	0.00381367	0.0356292	0.00252846	0.00797685	0.0159284	0.0152309	0.00297123	0.0170369
2273	712.4	218	Dimethylbenzimidazole	0.0149768	0.0101001	0.0128885	0.0124816	0.0131513	0.0122141	0.00992314	0.0110183	0.00936673	0.0110458	0.0207707	0.0118291	0.0100965	0.00677425	0.01152	0.00913598	0.0103425	0.0102025	0.013809	0.0120201	0.00864216	0.0102027	0.00865541	0.0126775	0.00928135	0.0114329	0.0100071	0.00930883	0.0140386	0.00975576	0.00811918	0.0150831	0.00949699	0.00948752	0.0127877
2993	815.8	218	Dopa	0.00540614	0.00290665	0.00651102	0.00650861	0.00967266	0.00874592	0.00499032	0.00443426	0.000560744	0.000854049	0.00308107	0.00358472	0.00369591	0.00532324	0.00507114	0.00620225	0.00491159	0.00598079	0.00522805	0.0046144	0.00924378	0.00680412	0.00548143	0.000851189	0.00553495	0.000706389	0.00811682	0.0059733	0.00682327	0.00253284	0.00654974	0.00708004	0.000921892	0.00444226	0.0112609
2373	724.8	103	Fructose	0.0457709	0.031249	0.0614569	0.0827798	0.0390339	0.0413889	0.0159872	0.0267568	0.0150796	0.0476241	0.0494366	0.00681997	0.0478234	0.0302332	0.0799589	0.0962678	0.0520857	0.0635908	0.0635649	0.0784257	0.0618138	0.0335486	0.0592624	0.0585688	0.0571024	0.0857154	0.0667174	0.0550866	0.0301342	0.14472	0.165393	0.12383	0.183263	0.0331589	0.0470203
3347	889.05	387	Fructose-6-Phosphate	0.00632181	0.00092978	0.0029294	0.01409	0.00376446	0.00344971	0.000611087	0.000981861	0.000802532	0.00107561	0.00322716	0.00245865	0.00237467	0.00231374	0.0107481	0.00546709	0.00626085	0.0138609	0.0134568	0.0268593	0.0999499	0.0567779	0.0314063	0.0781583	0.0312085	0.0595951	0.187225	0.134213	0.09808	0.0902178	0.120521	0.432626	0.269105	0.0187015	0.353052
1961	659.8	117	Fucose	0.0207455	0.0182205	0.0227394	0.0217449	0.0238067	0.0198076	0.0199947	0.0222757	0.0268835	0.02205	0.028055	0.0242865	0.0245425	0.0270087	0.0285786	0.0316808	0.0308081	0.0296341	0.0284057	0.0292362	0.0368678	0.0261794	0.0302049	0.033516	0.0298554	0.0350213	0.0319003	0.0276886	0.0334899	0.0311293	0.0298957	0.0359344	0.0331669	0.0236349	0.0248797
662	475.35	245	Fumaric acid	0.25922	0.234455	0.219079	0.209556	0.258202	0.238806	0.269224	0.21212	0.289508	0.261655	0.275012	0.287288	0.244906	0.236844	0.206794	0.198531	0.236972	0.255348	0.238349	0.210739	0.269465	0.262076	0.218932	0.268722	0.284022	0.280466	0.253861	0.254257	0.273758	0.224451	0.243774	0.202096	0.210459	0.219518	0.223065
2604	750	217	Galactitol	0.0011684	0.00361195	0.00828216	0.00137593	0.00543968	0.00630745	0.00264091	0.00117097	0.00698743	0.00773567	0.00334004	0.00149143	0.00150146	0.0026669	0.00141002	0.00211056	0.0054952	0.00449935	0.00566014	0.00204253	0.00485685	0.00146442	0.00132546	0.00119861	0.000726876	0.00102067	0.00416233	0.0054311	0.00695259	0.00202715	0.000842545	0.00759059	0.00086144	0.0044836	0.00177593
2592	747.85	205	Galactosamine	0.118219	0.0854789	0.151537	0.166164	0.101919	0.083197	0.0741247	0.0880588	0.10902	0.132629	0.161225	0.0545969	0.0925969	0.0551422	0.140407	0.178442	0.084086	0.0938877	0.074804	0.11131	0.100428	0.0558809	0.0888972	0.0700407	0.0700245	0.125247	0.116224	0.0892014	0.0645954	0.142159	0.173368	0.126095	0.18814	0.0594356	0.0942714
2426	729.55	205	Galactose	0.00345942	0.00214921	0.00834541	0.00235915	0.00252535	0.00745011	0.00236679	0.00232379	0.00245518	0.002547	0.00697225	0.00285754	0.0023074	0.00149035	0.00311834	0.00626093	0.00636258	0.00252016	0.00225833	0.00356441	0.0065365	0.00479938	0.00473176	0.00303128	0.00448855	0.00338655	0.00256893	0.00293746	0.00224703	0.00213531	0.00397762	0.00486203	0.00172892	0.00171053	0.0063813
2696	759.7	333	Galacturonic acid	0.000331474	0.00357719	0.00542585	0.00490311	0.00436412	0.00419048	0.000294177	0.000378221	0.00683953	0.00417935	0.00876511	0.0065464	0.000501333	0.000237036	0.00396865	0.00658709	0.00739416	0.00439849	0.000366441	0.00692857	0.00440482	0.000397888	0.00326805	0.00439665	0.00343834	0.00360684	0.0057953	0.00835941	0.00314288	0.000470615	0.000460032	0.000872326	0.00552228	0.000263812	0.000357861
2448	731.8	205	Glucose	0.0131399	0.00934559	0.0138879	0.012766	0.0141974	0.0092032	0.00236679	0.0220139	0.00245518	0.002547	0.00697225	0.00792663	0.00947837	0.00149035	0.0176921	0.0160337	0.0117382	0.0154078	0.0114587	0.015574	0.0334402	0.0227915	0.0334772	0.0415085	0.0222467	0.0312324	0.0603933	0.0370797	0.181367	0.0602022	0.144996	0.069005	0.141799	0.00831678	0.0969971
2646	756	333	Glucuronate	0.0563011	0.0269086	0.0348604	0.0262972	0.0467898	0.0349706	0.0165662	0.021256	0.0553567	0.0219458	0.0912568	0.0380023	0.0272789	0.0321467	0.036539	0.23936	0.0726013	0.0512664	0.0555355	0.0397361	0.0688219	0.071096	0.0518356	0.0429416	0.0345438	0.071755	0.0402617	0.1624	0.0702143	0.0284517	0.0560248	0.0853527	0.0250241	0.0498995	0.0720673
1538	613.35	246	Glutamic acid	4.25565	3.52869	3.76527	3.8262	3.75986	3.70875	2.79401	3.16813	3.2348	2.71738	3.12538	2.79741	3.52294	3.57329	3.58955	3.53258	3.45984	3.88642	3.69801	3.4539	3.57354	3.69345	3.31728	3.60307	3.58231	3.77688	3.38041	3.39916	3.65753	3.19057	3.53186	3.56553	3.36453	3.38177	3.77797
340	394.15	133	Glyceraldehyde	0.00376159	0.00287768	0.0061076	0.00255407	0.00552218	0.00339866	0.00973995	0.00372623	0.00765878	0.00445393	0.0145156	0.00939512	0.00447519	0.00930488	0.00675332	0.00542222	0.0060217	0.00470238	0.00392462	0.00253705	0.00552351	0.00196001	0.0073214	0.00294268	0.00389025	0.00667325	0.00445216	0.00958793	0.00621571	0.00777099	0.00234718	0.00462198	0.00448704	0.00353655	0.00721743
634	460.75	292	Glyceric acid	0.00186797	0.00142798	0.00216331	0.00133551	0.00260933	0.00271654	0.00116601	0.000500764	0.00183271	0.00301284	0.00244361	0.00220802	0.000437873	0.0011468	0.000830326	0.00233663	0.00161519	0.0021927	0.00248273	0.000654723	0.00293492	0.00202946	0.00196967	0.00145918	0.00228756	0.00226162	0.00219427	0.00209786	0.00243967	0.00693061	0.00905449	0.00105491	0.00521095	0.00130083	0.00254684
485	427.15	205	Glycerol	0.756072	0.782054	0.666608	0.616662	0.719413	0.606248	1.41976	0.982213	1.3794	1.2182	1.17211	1.6842	0.676719	0.938973	0.63205	1.01804	0.966761	0.641671	0.58084	0.628952	0.794021	0.681111	0.677782	0.749229	0.662285	0.593453	0.612542	0.660794	0.891668	0.968691	1.11587	0.650877	0.801606	0.770172	0.671462
1955	658.45	142	Glycerol-2-Phosphate	0.000582369	0.00237804	0.00207757	0.0018827	0.00242958	0.00216367	0.000403825	0.000532535	0.000616046	0.00078777	0.00693905	0.00286637	0.00295596	0.00118614	0.00068425	0.000710998	0.0021042	0.00178271	0.00278232	0.00253705	0.00273005	0.00198826	0.00281768	0.00336828	0.00363692	0.000747509	0.0039757	0.00429638	0.00516763	0.00338784	0.00279577	0.00631929	0.00325987	0.00056045	0.00381942
606	450.25	174	Glycine(3TMS)	2.16484	2.02669	1.66522	1.48166	1.82587	1.64373	2.36256	1.79089	2.52178	1.87542	2.13741	2.52808	2.32782	2.55221	2.02879	2.37039	2.15805	2.10015	1.97014	1.82197	2.40133	2.0109	2.95837	2.03682	2.54366	1.9806	2.05552	2.04809	2.03532	2.28597	2.14729	1.68058	2.009	1.84756	1.58568
128	301	205	Glycolic acid	0.00289353	0.00155832	0.00163338	0.00165025	0.00203472	0.00122412	0.00162199	0.00159155	0.00159992	0.0017384	0.0055114	0.00209153	0.00142404	0.00111033	0.0018667	0.00239876	0.0023505	0.00127318	0.00103248	0.00217138	0.00166502	0.00160686	0.00321959	0.00194905	0.00125389	0.00183867	0.00132618	0.00197661	0.00148455	0.00157261	0.00147668	0.00486203	0.00172892	0.00125463	0.00190971
1741	636.85	184	Homocysteine	0.00334587	0.00240845	0.00175145	0.00128931	0.00154998	0.00140117	0.00171425	0.00113315	0.00161407	0.00125172	0.00291506	0.00181266	0.00230233	0.0014107	0.0012132	0.00368442	0.00162768	0.00215733	0.00136789	0.00151318	0.00194306	0.00135965	0.00201385	0.0032571	0.00176309	0.00221462	0.00210661	0.0016792	0.00136196	0.00243492	0.00172575	0.00193738	0.00264024	0.00156221	0.00207192
834	527.6	218	homoserine	0.00287155	0.00543965	0.00417762	0.00465334	0.00596567	0.00309887	0.00444208	0.00447813	0.00504283	0.00521708	0.00308107	0.00570449	0.00432162	0.00695467	0.00595528	0.00524102	0.00505794	0.0041876	0.00460378	0.00541539	0.00404385	0.0042567	0.00484293	0.00549799	0.00411429	0.00577888	0.00400963	0.00488662	0.00657674	0.00322707	0.00594102	0.00527453	0.00577467	0.00365082	0.00524919
196	335	117	HydroxyButyrate	0.00306384	0.00217962	0.00172896	0.00253097	0.00204209	0.00169118	0.00238952	0.00245087	0.00181856	0.00217962	0.00847294	0.00379299	0.00184795	0.001356	0.00177136	0.00308732	0.0025843	0.0023525	0.00197663	0.0024465	0.0020016	0.00217661	0.00208511	0.00264216	0.00194385	0.00224693	0.00225224	0.00276359	0.00243563	0.00237061	0.00137755	0.00595413	0.00236518	0.00164852	0.00247827
1477	608.2	188	Hypotaurine	0.160996	0.0772224	0.140655	0.148383	0.151589	0.107151	0.0754846	0.0953887	0.123784	0.109886	0.147699	0.112828	0.159208	0.175582	0.215142	0.15167	0.140994	0.102496	0.188519	0.11349	0.16679	0.212544	0.160144	0.225416	0.275907	0.303797	0.400909	0.169343	0.27718	0.451003	0.620296	0.334713	0.652707	0.172401	0.269941
2212	704.65	265	Hypoxanthine	0.18355	0.240759	0.277208	0.235917	0.420337	0.301648	0.424557	0.409831	0.742125	0.416814	0.322689	0.693168	0.251572	0.240505	0.291466	0.300474	0.349355	0.231738	0.275544	0.256082	0.391501	0.257492	0.349326	0.219534	0.216418	0.27526	0.262426	0.334834	0.31806	0.141741	0.178991	0.203915	0.228319	0.256369	0.303222
2944	810.95	217	Inositol	10.4494	7.3708	8.65139	8.54359	8.59032	0.0722939	7.46302	8.24275	8.01217	9.13027	10.3018	9.46408	7.52733	6.2521	8.53371	8.67951	8.79163	7.71757	7.78373	9.81728	9.10843	7.021	7.62913	8.1167	7.32864	9.06659	8.28639	10.3741	8.17213	7.13679	7.39123	9.9248	7.4568	7.25782	9.2094
107	288.9	147	Lactic acid	3.67552	3.58546	3.07233	2.94029	2.30021	2.11858	2.79325	2.00167	2.33454	3.17295	2.89326	1.7044	2.99474	2.64392	2.96522	2.24469	1.9897	2.59148	2.0937	2.38152	2.45536	3.38043	2.01485	3.0841	3.51286	2.81493	3.35102	2.41734	3.9387	4.36346	2.86658	3.20063	2.72417	3.88177	2.97032
3883	1023.7	204	Lactitol	0.00643719	0.005192	0.00666705	0.00532326	0.00644893	0.00622815	0.00323328	0.00809392	0.0033889	0.00926766	0.0144226	0.00965281	0.000929053	0.00292313	0.00559394	0.00776058	0.00965899	0.00510843	0.00415856	0.00930194	0.00549424	0.00360336	0.0051636	0.00385815	0.00484881	0.00630169	0.00559171	0.00992423	0.00472308	0.00551438	0.00446053	0.010877	0.005217	0.00445807	0.00392142
1679	632.45	257	Lauric acid	0.00217564	0.00414925	0.00395272	0.00453495	0.00447462	0.00594575	0.00252057	0.00408327	0.00414127	0.00394832	0.071429	0.00844731	0.00423912	0.00269281	0.00670565	0.0078089	0.00829188	0.0044666	0.00546677	0.00462833	0.00561294	0.0063356	0.00697364	0.00350377	0.00480934	0.00464513	0.00452427	0.0094827	0.00457489	0.000494	0.00408945	0.0121044	0.00297272	0.00281562	0.00521575
2343	721.15	174	Lysine(3TMS)	0.53001	0.320105	0.506484	0.487106	0.517861	0.323608	0.646655	0.760296	0.770985	0.849252	0.626533	1.04466	0.678579	0.600695	0.738533	1.25396	1.19792	0.642483	0.687067	0.715929	0.768512	0.358347	0.793923	0.531236	0.548578	0.626358	0.537954	0.529144	0.335672	0.706871	1.22666	0.362188	1.17416	0.411492	0.554106
1622	623.8	217	Xlylose	0.0553085	0.0566369	0.0533491	0.0500952	0.0678766	0.0543329	0.0355928	0.0457813	0.0350272	0.0438311	0.0595762	0.0342252	0.0456784	0.03685	0.0448391	0.0799252	0.0514504	0.0424445	0.0517254	0.0587526	0.0423929	0.0362055	0.0323769	0.055838	0.0374271	0.054693	0.0467922	0.0710253	0.0400222	0.0405065	0.0366958	0.0901742	0.0415093	0.0423474	0.0497411
1658	629.25	217	Lyxose	0.0393264	0.0305915	0.0349251	0.0325575	0.0337018	0.0323551	0.0290687	0.031058	0.0309747	0.0300205	0.0351401	0.0311682	0.0323011	0.0308099	0.0325073	0.0304418	0.0288021	0.0293669	0.0380072	0.0325777	0.035819	0.02811	0.0340915	0.0383244	0.0351064	0.0368086	0.0349966	0.031047	0.0304346	0.0385744	0.0480352	0.0403637	0.0371039	0.0319201	0.0450554
928	547	147	Malic acid	1.25725	1.15528	1.05665	1.01403	1.21242	1.05388	1.11515	1.01723	1.30771	1.10307	1.2043	1.20738	1.01577	0.95437	0.917781	0.953694	1.06989	1.1293	1.18533	1.11416	1.21155	1.21563	0.947229	1.21571	1.24272	1.35895	1.27564	1.29818	1.39418	1.16327	1.24376	1.02096	1.15585	1.01315	1.18581
2395	727.45	205	Mannose	0.00345942	0.00214921	0.0025316	0.00235915	0.00252535	0.00154563	0.00236679	0.00232379	0.00245518	0.002547	0.00697225	0.00285754	0.0023074	0.00149035	0.00311834	0.00239876	0.0023505	0.00252016	0.00225833	0.00356441	0.00214957	0.00160686	0.00106322	0.00303128	0.00160014	0.00338655	0.00256893	0.00293746	0.00848833	0.00443577	0.0068776	0.00486203	0.00911766	0.00171053	0.00230269
981	554.1	217	meso-erythritol	0.0263604	0.0238919	0.0201206	0.0704729	0.0200128	0.0154368	0.0219376	0.0222727	0.0941419	0.0241861	0.0319528	0.0189155	0.0246719	0.0223313	0.0745848	0.0267159	0.0237388	0.0272476	0.0254551	0.0219854	0.0228273	0.0215766	0.0288053	0.0298524	0.0246959	0.0244916	0.0233961	0.0209374	0.022636	0.0380453	0.0386897	0.0274478	0.0367774	0.0229614	0.0253128
1081	567.25	219	Methionine	0.00598118	0.00468511	0.00737691	0.00990441	0.0084645	0.00511156	0.00959687	0.00803794	0.0115621	0.0112655	0.0175169	0.0140494	0.00960402	0.00787306	0.0149705	0.017171	0.0140369	0.00555771	0.00703877	0.00689374	0.0116486	0.00402244	0.010417	0.00617199	0.00581373	0.0100686	0.0055295	0.00742373	0.00388785	0.00503207	0.00831361	0.0142209	0.0139946	0.00649197	0.00611374
1693	633.55	158	N-Acetyl-L-Aspartic acid	5.04666	3.92931	4.41549	4.6605	4.55254	4.35863	3.78119	4.01328	3.84966	4.24716	4.50516	4.43323	4.05419	3.70783	4.7513	4.12167	4.24517	3.83555	3.67965	4.25608	4.044	3.99668	3.57988	3.84664	3.6766	3.81603	4.28308	4.31627	4.15036	2.21193	1.94493	3.69371	2.38137	3.72175	4.07288
2147	689.95	216	N-Acetyl-L-Glutamate	0.0124843	0.00860119	0.00909744	0.0104935	0.0109825	0.00889038	0.00684364	0.00562641	0.00530134	0.00846095	0.0142101	0.00977106	0.00691459	0.00791433	0.0094242	0.00950874	0.00750481	0.00919779	0.00748279	0.0100472	0.00700641	0.00784828	0.00758221	0.00935787	0.00553749	0.00923299	0.0082893	0.0104939	0.0099877	0.0101928	0.0111018	0.0124323	0.0111776	0.0067643	0.0120352
132	303.8	116	N-Methylethanolamine	0.00132406	0.00602329	0.00378685	0.0049753	0.00348452	0.00391568	0.00279602	0.00357645	0.00513415	0.00400513	0.0196817	0.00428013	0.00473665	0.00521672	0.00500656	0.00540842	0.00478131	0.00443516	0.00264148	0.00401888	0.0047414	0.00365869	0.00526907	0.00358716	0.00508176	0.00414141	0.00502759	0.00205211	0.00520266	0.00513877	0.00463463	0.00241749	0.00456714	0.00523248	0.00105017
2131	687.75	174	O-Phosphoethanolamine	1.72727	1.52615	1.54404	1.70856	1.9713	1.49827	1.17583	1.40465	1.55819	1.20168	1.47161	1.76333	1.31143	1.22178	1.37615	1.27282	1.36319	1.18727	1.25687	1.60486	1.57997	1.32498	1.52558	1.34548	1.11004	1.66809	1.45567	1.74181	1.81486	0.877292	0.992896	1.33856	0.917494	1.12946	1.60445
204	338.95	219	Oxalate	0.0055325	0.00365395	0.00167414	0.00270422	0.00339759	0.00284688	0.00390587	0.000972783	0.00356638	0.00313404	0.00911041	0.00306581	0.00267928	0.00384824	0.00364882	0.00327888	0.00100838	0.00329297	0.0029924	0.00311516	0.00452677	0.00372696	0.00326805	0.00283325	0.00357582	0.00351726	0.00390359	0.00331036	0.00309303	0.004541	0.00268648	0.00185961	0.00273243	0.00352317	0.00277426
448	421.15	144	Oxamic acid	0.0656904	0.0405772	0.0443402	0.0493878	0.0380041	0.0379174	0.0303003	0.036117	0.0469121	0.0562725	0.0535402	0.075025	0.0604506	0.0598272	0.0537113	0.0567522	0.0612093	0.0617701	0.0569427	0.0634646	0.082077	0.0543694	0.0716776	0.0592202	0.0582824	0.0448197	0.0662423	0.0270114	0.0434817	0.0528243	0.0650856	0.0125574	0.0597658	0.0241261	0.0483899
2769	775.05	291	Pantothenate	0.0124312	0.00805954	0.0103218	0.0138777	0.010623	0.00876221	0.00631545	0.0102271	0.0166423	0.0100649	0.0160893	0.0159256	0.00953676	0.00604587	0.00763592	0.0138921	0.010521	0.0102732	0.0133458	0.0169375	0.0169071	0.0122933	0.0127116	0.00948295	0.0107809	0.0106884	0.0145413	0.020091	0.012232	0.0108899	0.019207	0.0197152	0.0242488	0.00963827	0.0173596
1595	621.5	218	Phenylalanine	0.10685	0.0825781	0.118801	0.146608	0.10929	0.0997048	0.149722	0.168969	0.199193	0.187158	0.193331	0.189553	0.188294	0.150356	0.202701	0.297929	0.247573	0.161644	0.167281	0.187848	0.220965	0.140976	0.227438	0.150424	0.14349	0.205261	0.160143	0.166605	0.130368	0.144809	0.172151	0.123519	0.172886	0.115044	0.136718
497	427.8	299	Phosphate	5.22998	4.70583	4.88444	4.73581	4.88236	4.61226	4.77105	4.48384	5.12338	4.94991	4.84121	5.26451	4.94208	4.95281	4.71002	4.70912	4.97864	4.69387	4.51377	4.54753	4.5458	4.63899	4.41264	4.20609	4.65153	4.59313	4.4942	4.37427	4.49147	3.7799	3.72525	3.88075	3.74923	4.82405	4.35738
1432	602.9	158	Phosphoenolpyruvic acid	0.00507833	0.00554971	0.00483547	0.00566832	0.0059362	0.00575892	0.00342583	0.00395165	0.010213	0.00402596	0.00430951	0.0041001	0.00471507	0.00460254	0.00461292	0.00439887	0.00512576	0.00502067	0.00539515	0.00461788	0.00432677	0.00575643	0.00512085	0.00479793	0.00498374	0.0075588	0.00507849	0.00567589	0.00482546	0.00414784	0.00479729	0.00683322	0.00513539	0.00511456	0.00511039
591	446.7	216	Proline	0.00489519	0.0053571	0.00431679	0.00225231	0.00493136	0.00298048	0.0147624	0.00916958	0.00655658	0.00634193	0.0134797	0.00676702	0.00427212	0.00659671	0.00571849	0.00493902	0.0065482	0.00434871	0.00332781	0.00331889	0.00320809	0.00432615	0.004994	0.00443661	0.00512377	0.00641771	0.00381028	0.00742601	0.00532255	0.00721561	0.00723343	0.00799294	0.00495706	0.00522762	0.00259533
2020	670.5	214	Putrescine	0.001075	0.00123536	0.00198198	0.00239381	0.00201557	0.00134686	0.00225982	0.00150683	0.000276513	0.00204517	0.00197879	0.00107842	0.00200026	0.00123317	0.00148844	0.00174988	0.00207208	0.00302707	0.00148486	0.00151143	0.00190892	0.00172575	0.00223618	0.00355762	0.00245941	0.00485954	0.00422453	0.00633476	0.00509489	0.0107935	0.00987416	0.00664726	0.013582	0.00305512	0.00685957
1123	570.5	230	Pyroglutamic acid	0.793419	0.61123	0.771482	0.803992	0.768546	0.772882	0.506483	0.645931	0.680717	0.698559	0.451536	0.542379	0.742425	0.699528	0.837478	0.891737	0.805878	0.792125	0.850486	0.915255	0.932806	0.723739	0.80558	0.892358	0.822426	1.09701	0.945621	0.898303	0.791725	0.559487	0.612693	0.629647	0.744242	0.581878	0.90224
96	282.95	174	Pyruvate	0.0175205	0.0142262	0.0135562	0.0105931	0.0105022	0.010033	0.0132059	0.00920891	0.0111184	0.0108148	0.014489	0.0115008	0.0155667	0.0154294	0.00999466	0.0138455	0.00819908	0.0180734	0.0129197	0.00955791	0.012621	0.0129302	0.0113591	0.0250163	0.0233262	0.0173029	0.0148424	0.0114868	0.015608	0.0343227	0.0267403	0.0157593	0.0138133	0.0125025	0.0142877
1938	657.35	217	Ribitol	0.0151398	0.00763086	0.0119074	0.0105989	0.0118591	0.0113766	0.0225019	0.0176765	0.0332588	0.0200294	0.0190774	0.0284236	0.0117337	0.0135763	0.0123965	0.0315894	0.0188254	0.0169744	0.0200838	0.0206656	0.0274419	0.0125088	0.0254874	0.0172392	0.0188237	0.0229143	0.0163665	0.0221522	0.01411	0.0155069	0.021436	0.0129023	0.0190272	0.0117257	0.0147158
1727	636.1	217	Ribose	0.0228479	0.0261482	0.0271841	0.0230934	0.0345446	0.0242196	0.0308779	0.0281653	0.0555561	0.0393127	0.0358307	0.0416806	0.0268842	0.0226509	0.0249359	0.0274545	0.0315077	0.0287775	0.0293845	0.0308521	0.0434677	0.0319605	0.0402741	0.032578	0.0241193	0.0295817	0.0249937	0.0337053	0.0316403	0.0299337	0.0299834	0.0302034	0.0381648	0.0322435	0.033843
3621	958.6	299	Ribulose-1,5-Bisphosphate	0.00652509	0.00736293	0.00937717	0.00798416	0.00935736	0.0109063	0.00554658	0.00581249	0.00577463	0.0103319	0.0130215	0.00917802	0.00701867	0.00530117	0.0105282	0.0192073	0.0101766	0.00661083	0.00827297	0.0114646	0.0122291	0.00978828	0.00663444	0.00867345	0.00546366	0.00968384	0.0112781	0.0117887	0.0146623	0.006498	0.00929086	0.027032	0.00868089	0.00753628	0.0139181
3017	817.65	357	Ribulose-5-phosphate	0.0339349	0.022671	0.0236165	0.029114	0.0348289	0.0313602	0.0215191	0.0207356	0.0179026	0.0219174	0.0289979	0.0344882	0.0248598	0.0184658	0.039625	0.0337362	0.0321681	0.0265062	0.0304826	0.0290568	0.0421409	0.0389283	0.0312538	0.0389411	0.0679883	0.0379849	0.0600413	0.0704076	0.132567	0.0362768	0.0417358	0.0743945	0.0529982	0.0534912	0.0620505
2795	781.9	173	S-Benzyl-L-Cysteine	0.00318471	0.000682128	0.000513066	0.000584735	0.00219237	0.0026568	0.00189744	0.000538586	0.000506727	0.00269281	0.00231744	0.00220978	0.00133773	0.00130802	0.00249713	0.00102163	0.00230052	0.00195561	0.00180594	0.00260844	0.00290403	0.000505012	0.000572942	0.00188304	0.00159251	0.00236589	0.00273294	0.00405159	0.000555022	0.000615307	0.00216418	0.00421962	0.0021944	0.00163029	0.00330771
677	478.1	204	Serine(3TMS)	0.726618	1.06484	0.662051	0.71351	1.12794	0.909135	1.36355	0.955618	0.902	0.746969	0.867786	0.84367	1.16372	1.45546	0.853557	1.19619	1.23815	0.963713	1.20965	0.819035	0.986122	1.30027	1.10469	1.07153	1.47999	1.69775	0.975715	1.40366	0.951045	1.02562	1.1354	0.949361	0.732976	0.942248	0.654878
622	454.7	147	Succinic acid	0.786124	0.505728	0.61401	0.572226	0.35751	0.249674	0.650234	0.525046	0.550475	0.509051	0.295238	0.35388	0.451747	0.364496	0.269281	0.189547	0.124653	0.502135	0.379813	0.349892	0.251021	0.332484	0.07065	0.782254	0.716736	0.729629	0.322825	0.23338	0.121441	0.840878	0.574532	0.590943	0.460701	0.398812	0.426475
3772	987.95	217	Sucrose	0.00270307	0.00190735	0.0024571	0.00274465	0.00192569	0.0028925	0.00177844	0.00309536	0.00228284	0.00291248	0.0211359	0.00259809	0.00273766	0.00223601	0.00246176	0.00339795	0.00343026	0.00148275	0.00290407	0.00337461	0.00256582	0.00210598	0.00258821	0.00416388	0.00171599	0.00210154	0.00180688	0.00236324	0.00218506	0.00235746	0.00265344	0.00575465	0.0024211	0.00239376	0.0037057
2269	712.2	217	Tagatose	0.0319735	0.0237557	0.0233326	0.0224091	0.0240955	0.0247942	0.0195294	0.0227432	0.0209391	0.021338	0.0311892	0.0198351	0.0215446	0.0179917	0.0218975	0.0198614	0.0190289	0.0179712	0.0247676	0.02392	0.0227038	0.0248468	0.0180804	0.0229665	0.0193329	0.0237588	0.0215751	0.0247488	0.0290012	0.0163268	0.0177621	0.023475	0.0215632	0.0204825	0.0358346
1791	640.15	326	Taurine	2.04612	2.78319	3.30288	3.08248	3.47105	2.96018	2.41182	2.65132	2.61701	3.19977	3.94781	4.019	2.54185	1.7514	2.94244	3.06788	3.31048	2.69825	2.59141	3.51638	3.00259	2.22668	2.81705	3.0293	2.51694	2.97413	2.54074	4.16354	3.01478	2.30249	2.95089	4.98051	2.98641	2.17648	3.24273
952	550.15	217	Threitol	0.00303821	0.00219266	0.00103457	0.00257717	0.0012892	0.000752723	0.00164071	0.00117097	0.00393035	0.00138049	0.00334004	0.00343823	0.0010712	0.00165925	0.00273854	0.00137885	0.00142065	0.0026315	0.00275845	0.00348431	0.00307313	0.000901723	0.00276352	0.00287494	0.0016256	0.00276975	0.00279515	0.00166776	0.00117201	0.00407184	0.00515693	0.00183256	0.00086144	0.00232082	0.00106188
1653	628.95	218	Threo-beta-HydroxyAspartic acid	0.00882526	0.00785389	0.00752169	0.00848083	0.00727549	0.00690702	0.00658289	0.00619677	0.00677008	0.00554848	0.0076894	0.00709708	0.00762661	0.00684623	0.00581536	0.00634204	0.00488661	0.00740984	0.00880532	0.00753976	0.00678528	0.00589298	0.00601589	0.00955069	0.0083457	0.00981895	0.00899905	0.00420716	0.00770564	0.0137911	0.00968227	0.00833105	0.0068356	0.0100091	0.00915556
1090	567.9	230	trans-4-Hydroxy-L-proline	0.0480399	0.0396214	0.0513994	0.0499378	0.0603241	0.055872	0.0588997	0.054668	0.0512656	0.0491921	0.0639721	0.0623064	0.0534231	0.0480119	0.0427034	0.0683404	0.0692138	0.0568346	0.0777009	0.0843077	0.0640984	0.0488896	0.0528332	0.0730008	0.0558854	0.0870885	0.0449967	0.0766783	0.063352	0.0297043	0.052924	0.0427034	0.0469213	0.0299774	0.0333731
3874	1019.75	361	Trehalose	0.0033825	0.00195225	0.000794199	0.000727671	0.000780885	0.00165099	0.000430569	0.00266419	0.000487435	0.000890028	0.00253657	0.000707767	0.0013847	0.00150763	0.00184056	0.000655775	0.00300371	0.0019674	0.00238962	0.000776612	0.00174632	0.00250387	0.000648479	0.00227563	0.00220354	0.00550866	0.000774781	0.00553863	0.00233864	0.0156691	0.011835	0.0295543	0.0139251	0.0107981	0.0100469
3208	863.1	202	Tryptophan	0.0195899	0.00984379	0.0129096	0.0117871	0.0211738	0.0286078	0.0308913	0.0317282	0.0236245	0.0272178	0.0436463	0.043608	0.015917	0.0140466	0.0196095	0.0425736	0.0438724	0.0130317	0.0208931	0.0175643	0.0211412	0.0166183	0.0290675	0.0132143	0.0106804	0.0211329	0.015087	0.0424697	0.0216216	0.000305461	0.020291	0.0269846	0.0181749	0.0100723	0.0251289
2637	754.95	218	Tyrosine	0.0210367	0.0157034	0.0257067	0.0343521	0.0233161	0.0221983	0.0467421	0.0553806	0.0419207	0.0427668	0.118947	0.0545845	0.048708	0.0393979	0.0546847	0.0869679	0.0601153	0.0270734	0.0341339	0.0380279	0.0448612	0.0265632	0.0468002	0.0266648	0.0256558	0.0325365	0.0256893	0.0405342	0.0209305	0.0263647	0.048513	0.0546117	0.0527942	0.0230587	0.0334717
650	469.25	241	Uracil	0.0248789	0.0363715	0.0317244	0.0194031	0.0339155	0.0274271	0.074681	0.0558223	0.0956042	0.0576322	0.0491444	0.108583	0.0403453	0.0494686	0.0311418	0.0472227	0.0498387	0.0341557	0.0338868	0.0321981	0.0405019	0.0371237	0.0457299	0.0323452	0.0294391	0.0248866	0.0239899	0.036112	0.0367716	0.0311337	0.0429736	0.0276778	0.0379593	0.0364414	0.0269115
399	412.75	147	Urea	6.68525	4.65911	7.5521	6.20692	5.29447	3.41686	4.29675	4.65163	6.44583	4.54539	5.85142	6.34341	6.51021	5.79879	10.1886	5.6608	6.2446	6.34158	5.58343	6.31903	5.04774	5.37046	5.79626	3.8555	3.7078	4.7044	11.031	3.43625	4.12231	3.89194	3.85308	4.38806	2.29235	3.75686	3.53374
2987	815.2	441	Uric acid	0.00042121	0.000325857	0.00030784	0.00049522	0.00127594	0.000281321	0.00032627	0.00041453	0.000351108	0.000496144	0.00124836	0.000905447	0.000261455	0.000825309	0.000422851	0.00172918	0.000599671	0.000310435	0.00134282	0.000454475	0.000323573	0.000226019	0.000899319	0.000397801	0.000400991	0.000365677	0.000313871	0.00127885	0.000775953	0.00426915	0.0130245	0.000605218	0.0226604	0.000367149	0.000503347
338	394.05	144	Valine(2TMS)	0.224875	0.257296	0.145056	0.131775	0.196705	0.139782	0.573234	0.347144	0.322718	0.294474	0.434697	0.357941	0.225144	0.432025	0.155409	0.355399	0.326571	0.199161	0.189289	0.150619	0.194947	0.22728	0.304581	0.22264	0.289992	0.222138	0.168348	0.227246	0.17959	0.350941	0.263729	0.202691	0.166888	0.220756	0.111017
2852	787.3	353	Xanthine	0.013671	0.0242003	0.0307924	0.0241922	0.0425332	0.0347882	0.0354684	0.0514335	0.073397	0.0605712	0.0270125	0.106389	0.0283247	0.020341	0.0412872	0.0742148	0.0599832	0.0272436	0.0337328	0.0390239	0.0459831	0.02322	0.0490264	0.0191813	0.0242173	0.0331004	0.0303734	0.0555167	0.0354998	0.020064	0.0463844	0.0344231	0.0487771	0.0267314	0.0531859
1881	648.55	188	Xylitol	0.029177	0.0278948	0.0183115	0.0182654	0.010044	0.00139465	0.0240089	0.0260095	0.0179708	0.0158501	0.0390446	0.00880913	0.0266494	0.0238639	0.00935962	0.00640416	0.00182578	0.0244196	0.0187541	0.0143273	0.00970556	0.00119131	0.00181574	0.0317476	0.0210781	0.0195087	0.00143363	0.0112168	0.0014347	0.0250654	0.0176579	0.0194278	0.00106093	0.00749373	0.00657027

## Sheet: legends
C: control
M1: 1h-MCAO
R1: 1h-MCAO and 1h-reperfusion
R3: 1h-MCAO and 3h-reperfusion
R5: 1h-MCAO and 5h-reperfusion
R24: 1h-MCAO and 24h-reperfusion
